# Supplementary material
Source: PubMed Central journal article supplement (PMC5994930)
Supplement: NIHMS966341-supplement-1.pdf [file NIHMS966341-supplement-1.pdf]

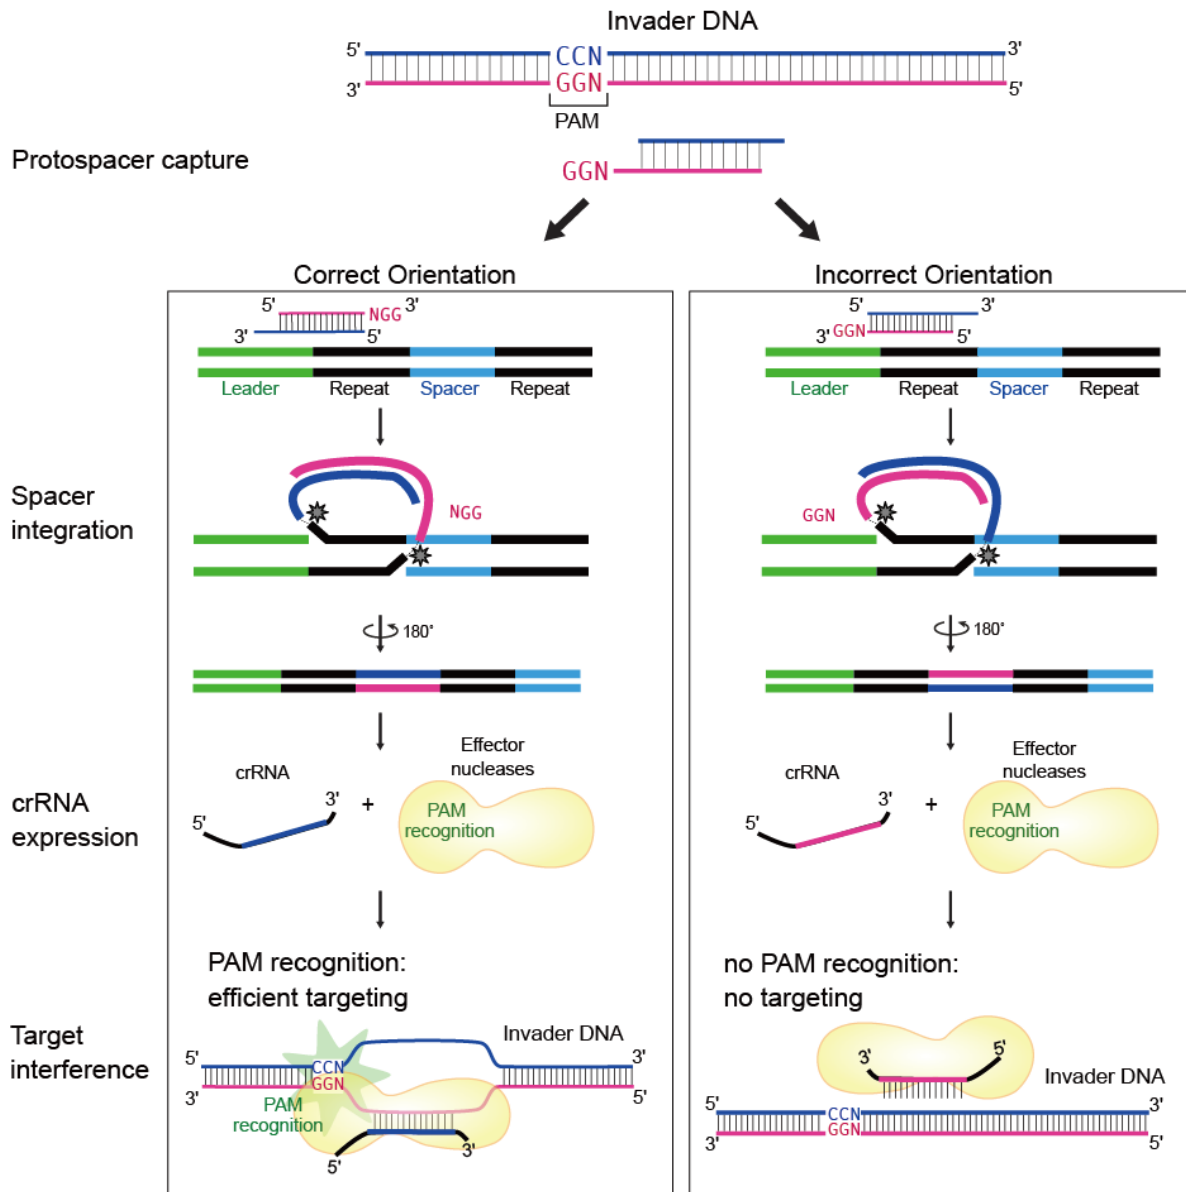

**Figure S1. Related to Figure 2; CRISPR-Cas immunity requires that the spacer is integrated into the CRISPR array in a polarized manner.** Protospacers are integrated into the leader-proximal repeat of the CRISPR array. When spacer integration is in the correct orientation (left panel), the PAM adjacent side of the spacer points towards the leader. After crRNA expression, target interference is initiated by strand-specific recognition of the 5'-NGG-3' PAM on the target strand by immune effector nucleases. When spacers are integrated in the incorrect orientation (right panel), the PAM adjacent side of the spacer points away from the leader and the resulting crRNA cannot initiate target interference because effector crRNA-Cas protein complexes cannot recognize the NGG PAM on the DNA target strand (complementary to crRNA). Thus, target interference requires that a spacer is integrated in the correct orientation.

**A**

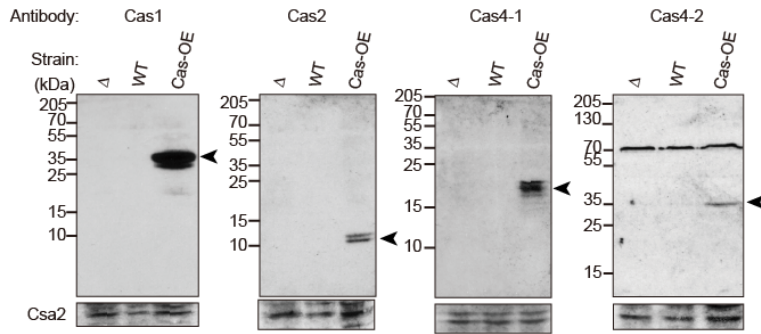

**B**

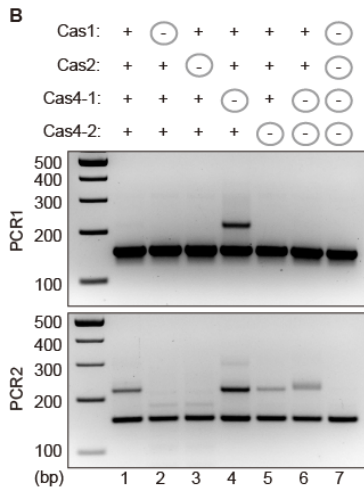

**C**

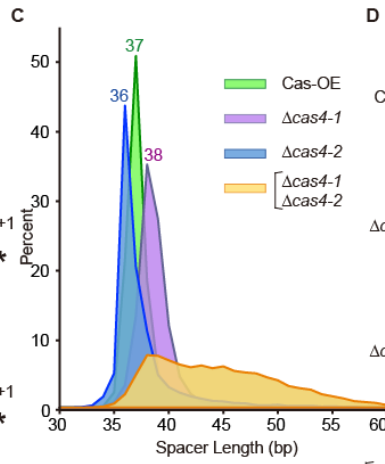

**D**

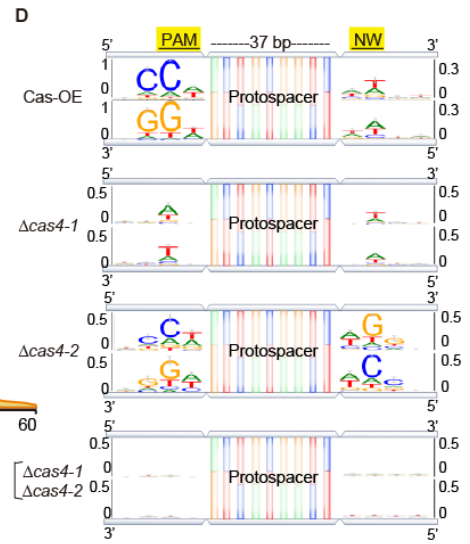

**E**

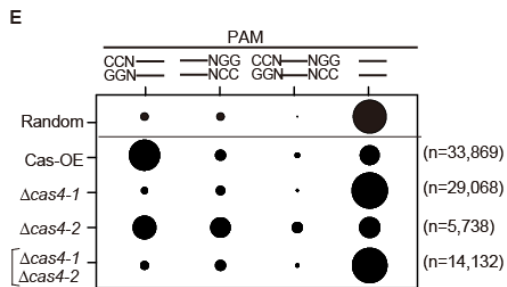

**F**

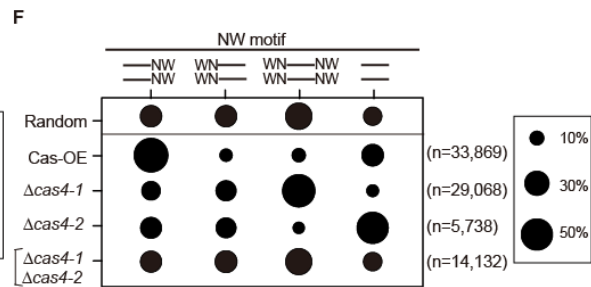

**Figure S2. Related to Figure 2; Cas4 deletion mutants in Cas overexpression background.** (A) Western blot with Cas1, Cas2, Cas4-1, Cas4-2 and Csa2 antibodies for *P. furiosus* strains:  $\Delta$  (Cas1, Cas2, Cas4-1 and Cas4-2 deletion strain), wild type (WT) and Cas-OE (Cas1, Cas2, Cas4-1 and Cas4-2 overexpression strain). Csa2 is used as a loading control. The indicated antibodies detect a major band (shown by arrowhead) of the expected molecular weight for each antigen. The predicted molecular weight of each protein are as follows: Cas1 (37.5 kDa), Cas2 (10.0 kDa), Cas4-1 (20.2 kDa), Cas4-2 (25.1 kDa) and Csa2 (37.4 kDa). (B) Analysis of adaptation in deletion strains created in a background strain overexpressing Cas1, Cas2, Cas4-1, and Cas4-2 proteins. The leader/first spacer region of CRISPR7 was amplified with primers indicated in Figure 1D. The PCR product corresponding to the parental array with no new spacer is indicated with an asterisk and the product corresponding to the array with a new repeat-spacer unit is indicated with a +1. (C) Line graph showing the length distributions of new spacers acquired into the CRISPR5 and CRISPR7 arrays. The X-axis indicates spacer length, and the Y-axis indicates % of spacers observed. Pooled data from four experiments are presented. (D) Newly-acquired spacers in CRISPR7 arrays were aligned to the genome and plasmids to identify the corresponding protospacers, and upstream and downstream sequences were extracted and used to generate consensus motifs on both strands of DNA. Four bp of flanking sequence on each side of the protospacers is shown. (E and F) Percentage of protospacers with/without upstream and/or downstream motifs. (E) CCN/NGG motif. (F) NW/WN motif. “Random” indicates the percentage at which each scenario (upstream, downstream, both, neither) would be observed if 37 bp spacers were selected randomly from the *P. furiosus* genome. Representations show data that were pooled from between 4 experiments (CRISPR5 and CRISPR7 arrays, 2 replicates each, see Supplemental Table 2 for raw values).



**Figure S3. Related to Figure 2; Complementation of Cas4 deletion strains.** (A) Line graph showing the length distributions of new spacers acquired into the CRISPR5 and CRISPR7 arrays. The X-axis indicates spacer length, and the Y-axis indicates % of spacers observed. Pooled data from eight experiments for deletion strains and four experiments for complemented strains are presented. (B) Newly-acquired spacers in CRISPR5 and CRISPR7 arrays were aligned to the genome and plasmids to identify the corresponding protospacers, and upstream and downstream sequences were extracted and used to generate consensus motifs on both strands of DNA. Four bp of flanking sequence on each side of the protospacers is shown. (C, D) Percentage of protospacers with/without upstream and/or downstream motifs. (C) CCN/NGG motif. (D) NW/WN motif. “Random” indicates the percentage at which each scenario (upstream, downstream, both, neither) would be observed if 37 bp spacers were selected randomly from the *P. furiosus* genome.

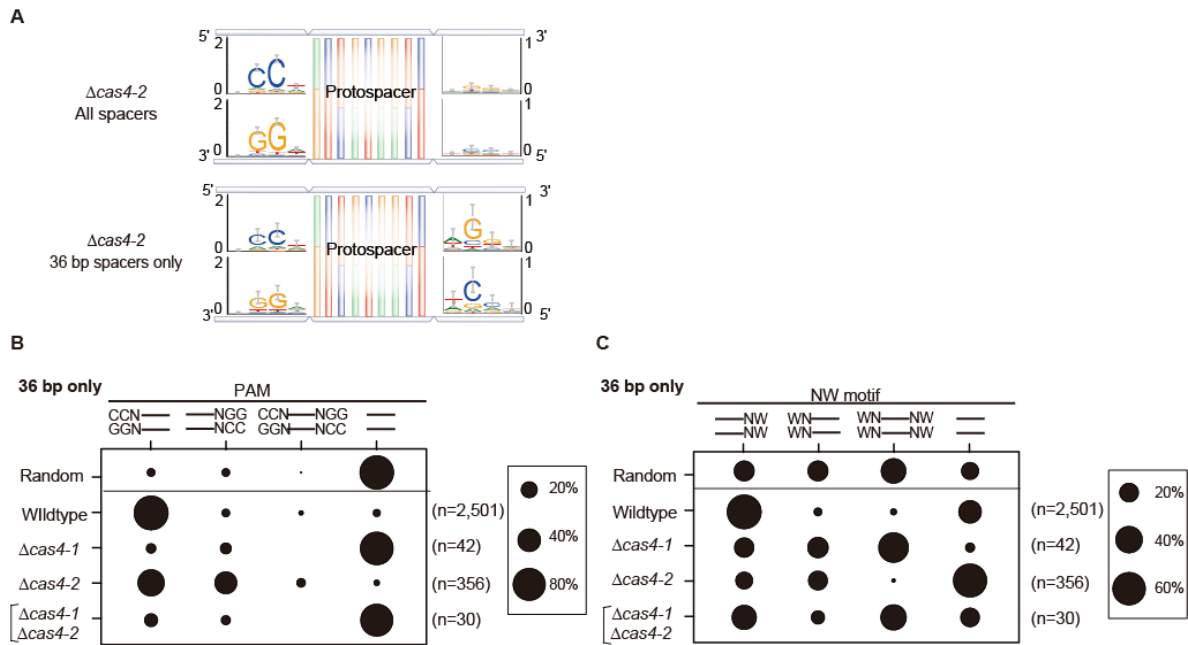

**Figure S4. Related to Figure 2; Cas4-1 and Cas4-2 define the correct orientation.** (A) Newly-acquired spacers in the CRISPR5 and CRISPR7 arrays in  $\Delta Cas4-2$  were aligned to the genome and plasmids to identify the corresponding protospacers, and upstream and downstream sequences were extracted and used to generate consensus motifs on both strands of DNA. Four bp of flanking sequence on each side of the protospacers is shown. (B, C) Percentage of 36 bp protospacers with/without upstream and/or downstream motifs. Data from 8 replicates were pooled. “Random” indicates the percentage at which each scenario (upstream, downstream, both, neither) would be observed if 37 bp spacers were selected randomly from the *P. furiosus* genome. (B) CCN/NGG motif. (C) NW/WN motif.

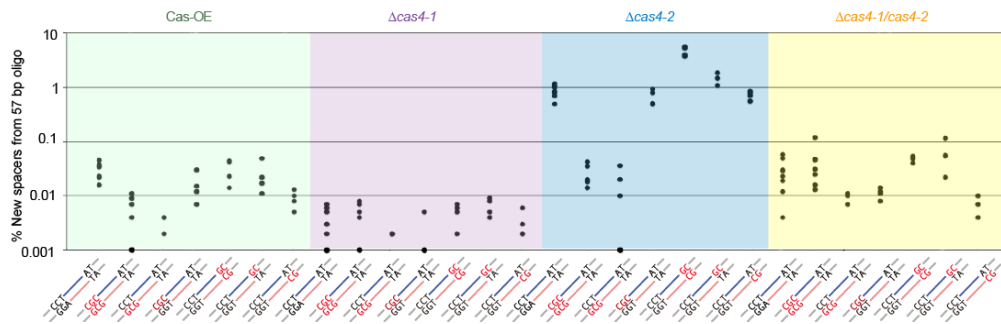

**Figure S5. Related to Figure 3 and Figure 4; Cas4-1 protects DNA fragments with NGG PAM.** A scatter plot shows the relative abundance of integrated 57 bp duplexed DNA oligonucleotide detected in a genome-wide adaptation assay. Most new spacers captured in the assay were derived from genome or plasmid DNA; the percent of new spacers corresponding to processed 57 bp oligo is indicated on the Y-axis (out of total spacers). The version of 57 bp oligo used is indicated along the X-axis. Above, the strain in which the experiment was conducted is shown (*cas-OE*,  $\Delta cas4-1$ ,  $\Delta cas4-2$ ,  $\Delta cas4-1/\Delta cas4-2$ ). Pooled data from eight experiments are presented for wildtype oligo and mutated PAM oligo, and data from four experiments are presented for other samples. In this assay, the 57 bp duplexed DNA oligonucleotide was added at the beginning of the experiment. Its abundance, in proportion to cellular DNA with continuous turnover, is presumed to reflect a combination of both its stability and integration efficiency.



**A**

|               |   |         |                         |               |               |       |    |
|---------------|---|---------|-------------------------|---------------|---------------|-------|----|
| Cas4-1 PF1119 | 1 | ME----- | -----EYALEELFVRGIEINLYV | CPTKLWFFTHGIT | ---MEQESEWVDL | GKFLH | 49 |
| Cas4-2 PF1793 | 1 | -----   | -----MIEFYASEALI        | CPRRVWFR      | IKGFP         | PEKWP | 42 |
| SSO0001       | 1 | M-----  | ITE-----                | FLLKK-KLEEHL  | SHVKE         | ENTYV | 62 |
| SSO1449       | 1 | M-----  | -----                   | VSVTDL        | KDYSL         | CKVIP | 40 |
| SSO1392       | 1 | M-----  | RVIAC-----              | FIRFV-----    | TLNVLMT       | ISGIT | 56 |
| PAE1763       | 1 | MELYLR  | PPLCTV                  | VNCKD         | LEHLD         | VDTAL | 94 |
| Pis1_1772     | 1 | MELLR   | PRPIC                   | RINC          | DLEN          | DAE   | 94 |
| Pca10546      | 1 | MELLS   | PKPLC                   | SVVNC         | EDLE          | KLDH  | 94 |

Fe-S cluster

|  |                      |  |                      |  |
|--|----------------------|--|----------------------|--|
|  | Nuclease<br>(D to A) |  | Helicase<br>(H to A) |  |
|  | *                    |  | *                    |  |

|           |              |              |              |          |          |       |         |       |        |      |      |        |     |
|-----------|--------------|--------------|--------------|----------|----------|-------|---------|-------|--------|------|------|--------|-----|
| PF1119    | EQRYENE----- | EKEVLIG----- | PIRIDFISRG-- | DVIEVHEV | KLGKR--- | MERAH | EMQAL   | YLYL  | YLLK   | KHG  | IK-A | KAILHY | 115 |
| PF1793    | EVMGKIL-R    | DEFGF---     | ELEKHMIL     | RFPRL    | GFEI     | HGRMD | AYK---- | EFPIE | IKG    | SIL  | PRF  | PLEY   | 120 |
| SSO0001   | LGLESVL-     | KGNFNA       | ETEV         | TREIN    | VGGKV--  | YKIG  | GRAD    | AI    | IRN    | DNGK | SIV  | IEIK   | 148 |
| SSO1449   | L--KEIV-     | RDFPE---     | PKYYE        | VHL      | RDKD--   | SGLN  | GIV     | DV    | LTE--- | DSV  | IEI  | KAF    | 115 |
| SSO1392   | KDKVMN       | FLYATL       | K---         | PLNV     | VGKPI    | FRY-- | GDLI    | GSP   | DY     | VLI  | YIP- | NHW    | 137 |
| PAE1763   | ERYERAV-     | SIFDN---     | VIAEY        | KIEI-    | GDLV     | GVV   | DIV     | M     | RKG-   | NEY  | IP   | VEI    | 167 |
| Pis1_1772 | ERYERAV-     | SVPDN---     | VIIEY        | KVEI-    | GDLV     | GVV   | DV      | V     | V      | KG-  | RNL  | IP     | 167 |
| Pca10546  | ERYERLL-     | SQYEN---     | VVAEY        | KVEI-    | GDLV     | GVV   | DV      | V     | V      | KG-  | GEY  | IP     | 166 |

RecB like motif-II      motif-III      QhxxY motif

|  |  |  |                  |  |
|--|--|--|------------------|--|
|  |  |  | Fe-S<br>(C to A) |  |
|  |  |  | *                |  |

|           |           |             |        |          |       |        |     |     |     |      |      |     |     |
|-----------|-----------|-------------|--------|----------|-------|--------|-----|-----|-----|------|------|-----|-----|
| PF1119    | PKLN----- | -----EKREVT | LEGRE- | REVEEA   | I     | VEVE   | VIK | SSK | PPK | PRK- | SKIC | RK  | 169 |
| PF1793    | VKLHDN    | PERIV       | ESID   | FRG      | FPRI  | KGK    | HLR | V   | FEV | PD   | TL   | FKE | 209 |
| SSO0001   | ITPD----- | -----RIA    | EY     | INE      | PL--- | DEAT   | IV  | RL  | A   | ED   | T    | IM  | 202 |
| SSO1449   | MNKE----- | -----RKIN   | IEV    | R        | KE    | VE     | Y   | I   | G   | V    | N    | EL  | 175 |
| SSO1392   | VSLK----- | -----EMV    | R      | LE       | Y     | NA     | E   | K   | R   | Y    | VE   | K   | 201 |
| PAE1763   | RNRV----- | -----EK     | VERD-  | -----SKA | V     | E      | M   | L   | Y   | K    | I    | K   | 214 |
| Pis1_1772 | RNRV----- | -----EI     | VERD-  | -----DN  | A     | L      | L   | L   | K   | E    | I    | R   | 218 |
| Pca10546  | RNHV----- | -----EV     | V      | H        | R     | N----- | DA  | A   | L   | D    | V    | L   | 213 |

Fe-S cluster

**B**

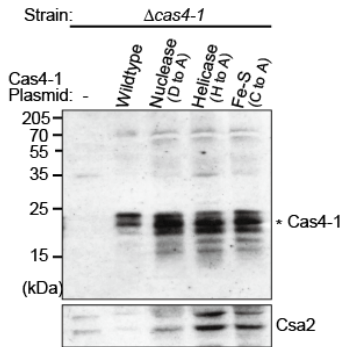

**C**

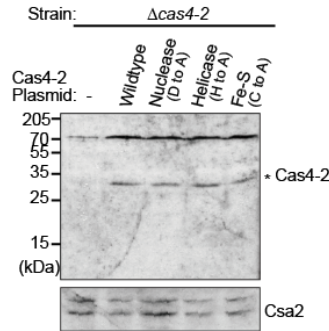

**Figure S6. Related to Figure 6; Sequence alignment of Cas4 proteins from *P. furiosus* and other organisms.** (A) The Rec-B like motif residues (II: E; III: EhK, and QhXXY) and conserved histidine predicted to support helicase activity(Lemak et al., 2013; Lemak et al., 2014; Zhang et al., 2012) are highlighted in yellow. We note that mutation of this conserved histidine residue in *Sulfolobus solfataricus* does not completely inactivate helicase activity (Lemak et al., 2013). The conserved cysteine residues involved in the coordination of the Fe-S cluster (Lemak et al., 2013; Lemak et al., 2014; Zhang et al., 2012) are highlighted in blue. Residues mutated to alanine are marked with asterisks. The proteins compared are: PF1119 (UniProt ID Q8U1T6), PF1793 (Q8U027) from *Pyrococcus furiosus*, SSO0001 (Q97TX9), SSO1449 (Q97Y86), SSO1392 (Q97YD3) from *Sulfolobus solfataricus*, PAE1763 (Q8ZWJ5) from *Pyrobaculum aerophilum*, Pisl\_1772 (A1RV91) from *Pyrobaculum islandicum*, Pcal\_0546 (A3MTK6) from *Pyrobaculum calidifontis*. (B, C) Western blot of *P. furiosus*. Csa2 is used as a loading control. The indicated antibodies detect a major band (indicated with asterisk) of the expected molecular weight for each antigen. (B)  $\Delta cas4-1$  strains with Cas4-1 and Csa2 antibodies. The predicted molecular weight of Cas4-1 is 20.2 kDa. (C)  $\Delta cas4-2$  strains with Cas4-2 and Csa2 antibodies. The predicted molecular weight of Cas4-2 is 25.1 kDa.

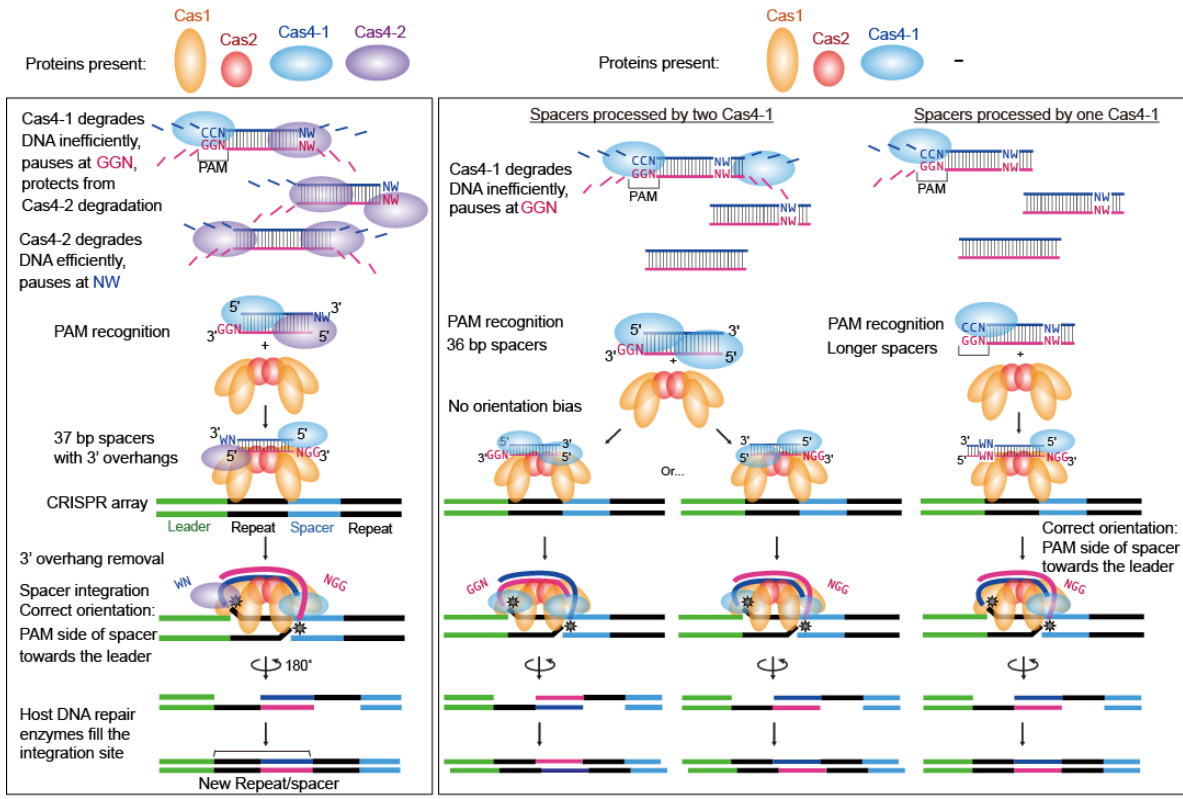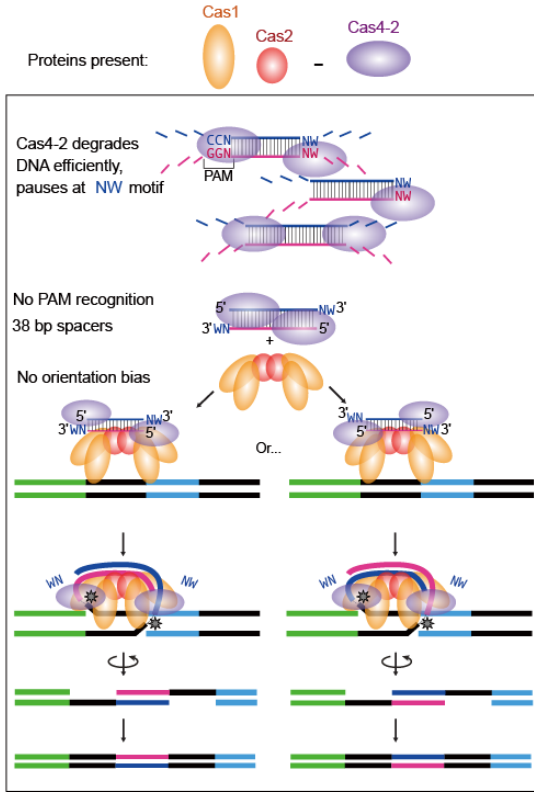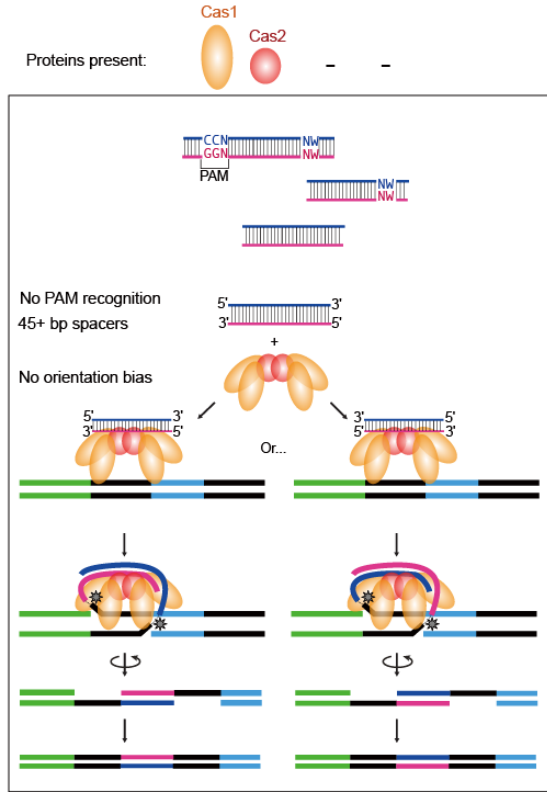

**Figure S7. Related to Figure 7; Model for Cas4 functions in *P. furiosus* spacer acquisition.** Top left panel: Cas1, Cas2, Cas4-1 and Cas4-2 can capture and trim spacers with both a PAM and a NW motif and then integrate them into the CRISPR array in the correct orientation. The resulting new spacers can produce crRNAs capable of initiating target interference. Cas4-1 nuclease recognizes the upstream PAM and produces an appropriate 3' DNA overhang. Cas4-2 is an efficient nuclease (see Figure S5) and degrades DNA but spares pre-spacers when they are bound by Cas4-1. Top right panel: Cas1, Cas2 and Cas4-1 can coordinate to capture and trim protospacers with a PAM and integrate spacers in the correct orientation if spacers are processed by one Cas4-1. However, they integrate spacers into the CRISPR array in both incorrect and correct orientations when spacers are processed by two Cas4-1. Bottom left panel: Cas1, Cas2 and Cas4-2 can coordinate to capture and trim spacers with a NW motif. Protospacers are not flanked by a PAM. Bottom right panel: Cas1 and Cas2 alone lead to indiscriminate spacer acquisition with respect to size and PAMs, and resultant spacers cannot generate crRNAs capable of target DNA recognition and interference.
